# Supplementary material
Source: Research Square preprint supplement (doi:10.21203/rs.3.rs-9671709/v1)
Supplement: Supplementary file 1 [file 6f8d4704f56d111e714f8ff5.docx]

#### Additional Files

**
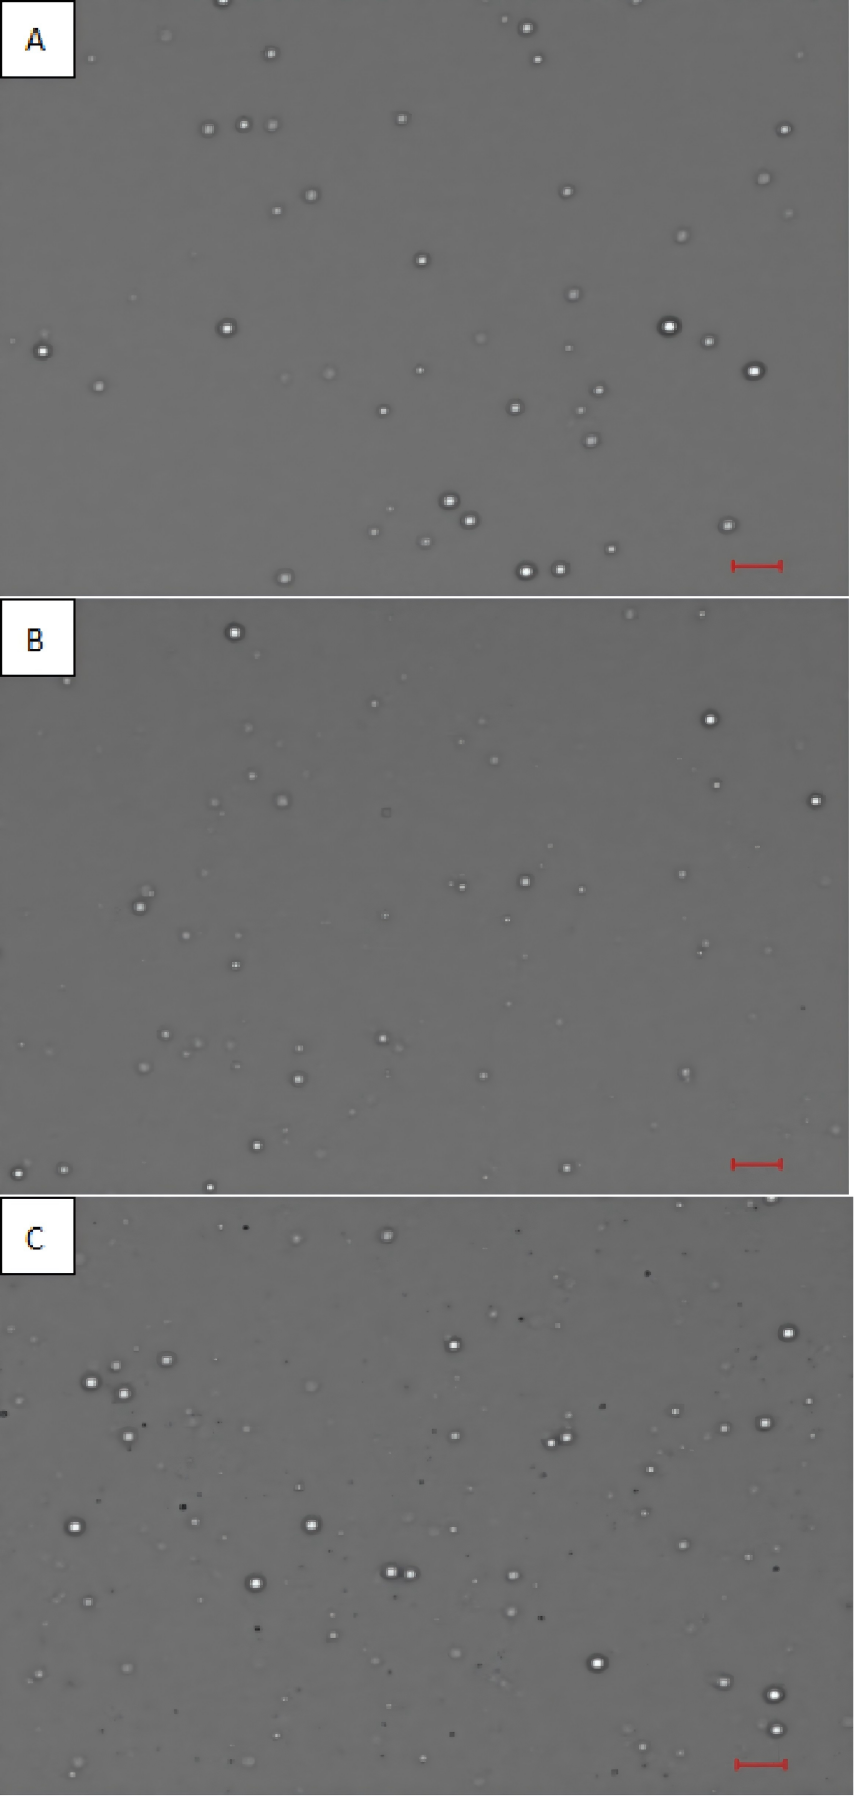
**

**Additional File 1**: Nanodroplets (A: PFB; B:PFP; C:PFH) observed under 63x objective oil lens. Red bars indicate 10 µm.


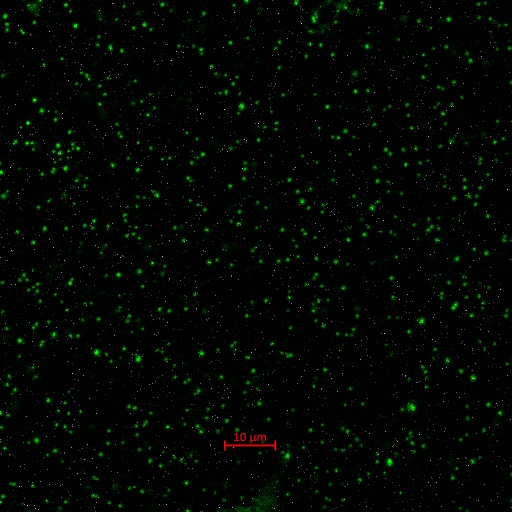


**Additional File 2**: Fluorescencely stained PFB nanodroplets with DiO observed under 63x objective oil lens. Some unstained nanodroplets were also noticed under the staining protocol used. Red bar indicates 10 µm.

**Additional File (Video) Legends**

**Additional File 3**: 2 droplets moving in a PFB nanodroplets treated erythrocyte. Bar indicates 2 µm.

**Additional File 4**: 1 droplet moving in a PFP nanodroplets treated erythrocyte, along with 1 droplet entrapped between membrane bilayers. Bar indicates 2 µm.

**Additional File 5**: 1 droplet moving in a PFH nanodroplets treated erythrocyte, along with 3 droplets entrapped between membrane bilayers. Bar indicates 2 µm.

**Additional File 6**: Droplets moving inside of a group of PFP nanodroplets treated erythrocytes. Bar indicates 2 µm.
